Thrombus formation on bioprosthetic aortic valves

R. Bing<sup>1</sup>, J. Andrews<sup>1</sup>, M. Williams<sup>1</sup>, T. Clark<sup>1</sup>, S. Semple<sup>1</sup>, E. Van Beek<sup>1</sup>, C. Lucatelli<sup>1</sup>, S. Sellers<sup>2</sup>, J. Leipsic<sup>2</sup>, A. Tavares<sup>1</sup>, A. Stephens<sup>3</sup>, N. Koglin<sup>3</sup>, M. Dweck<sup>1</sup>, D. Newby<sup>1</sup>

<sup>1</sup>University of Edinburgh, Edinburgh, United Kingdom; <sup>2</sup>University of British Columbia, Vancouver, Canada; <sup>3</sup>Life Molecular Imaging, Berlin, Germany

**Funding Acknowledgement:** Type of funding source: Foundation. Main funding source(s): British Heart Foundation

**Background:** 18F-GP1 is a novel radiotracer with a high affinity for the platelet glycoprotein IIb/IIIa receptor. Subclinical bioprosthetic valve thrombus has been postulated as a trigger for accelerated valve degeneration.

**Purpose:** To determine the feasibility of 18F-GP1 positron-emission tomography-computed tomography (PET-CT) for the detection of subclinical bioprosthetic aortic valve thrombus.

**Methods:** (i) Explanted degenerated aortic valve prostheses underwent histology and imaging. (ii) In a prospective observational study, patients with bioprosthetic aortic valve replacement (AVR) underwent echocardiography and 18F-GP1 PET-CT. Valves were assessed for hypoattenuating leaflet thickening (HALT), hypo-attenuation affection leaflet motion (HAM) and GP1 uptake.

**Results:** (i) GP1 correlated with thrombus on explanted valves (Figure). (ii) The first 6 patients (Table) were asymptomatic and had normally func-

tioning surgical bioprostheses on echocardiography. At a median of 166 (range 122–189) days post-AVR, no patients had HALT or HAM on CT. There was avid focal GP1 uptake on the leaflets of all 6 patients which appeared most prominent along the leaflet edges (Figure). Only one patient had focal uptake in the valve frame, remote from the leaflets. In a separate cohort undergoing 18F-GP1 PET-CT for other conditions, there was no uptake on normal, native aortic valves (n=8).

**Conclusion:** For the first time, we demonstrate that 18F-GP1 PET-CT is a highly sensitive method of assessing platelet activation on bioprosthetic aortic valves. Despite the absence of CT evidence, early thrombus appeared to be a universal finding on recently implanted valve prostheses. The biological and clinical implications of subclinical bioprosthetic aortic valve thrombus have yet to be established.

| Baseline characteristics          |                  |
|-----------------------------------|------------------|
| n                                 | 6                |
| Age                               | 71 (66–75)       |
| Female                            | 3 (50)           |
| Aortic valve Vmax (m/s)           | 2.45 (2.65–2.20) |
| Aortic vale peak gradient (mmHg)  | 24 (19.5–28.5)   |
| Aortic valve mean gradient (mmHg) | 24 (19.5–28.5)   |
| SUVmax                            | 14.1 (5.9–10.8)  |
| SUVmean                           | 4.1 (2.6–3.1)    |
| TBRmax                            | 7.0 (3.3–5.2)    |
| TBRmean                           | 2.1 (1.4–1.7)    |

n (%) or median (interquartile range). SUV, standardised uptake value; TBR, tissue to background ratio.

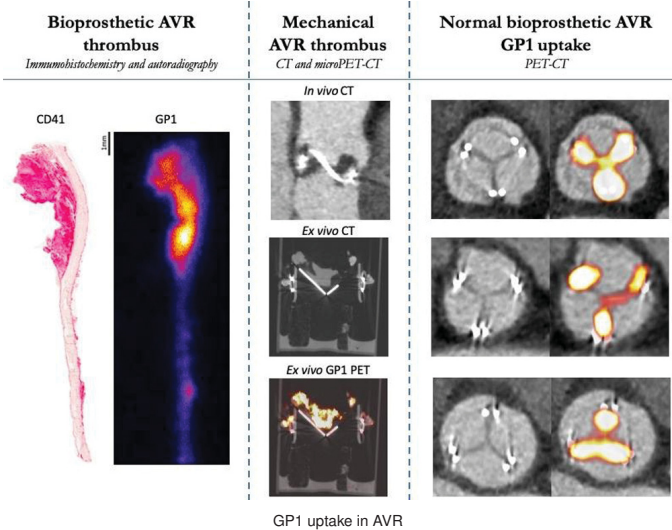

Source: http://academic.oup.com/eurheartj/article-pdf/41/Supplement_2/ehaa946.0290/34520408/ehaa946.0290.pdf
